# Supplementary material for: A novel gold nanorod-based spectrographic method for evaluating the curcumin inhibitory action on HepG2 cells
Source: Royal Society of Chemistry journal article supplement (doi:10.1039/c3ay40249e), 2013-01-01
Supplement: c3ay40249e.pdf [file c3ay40249e.pdf]

## Supporting information

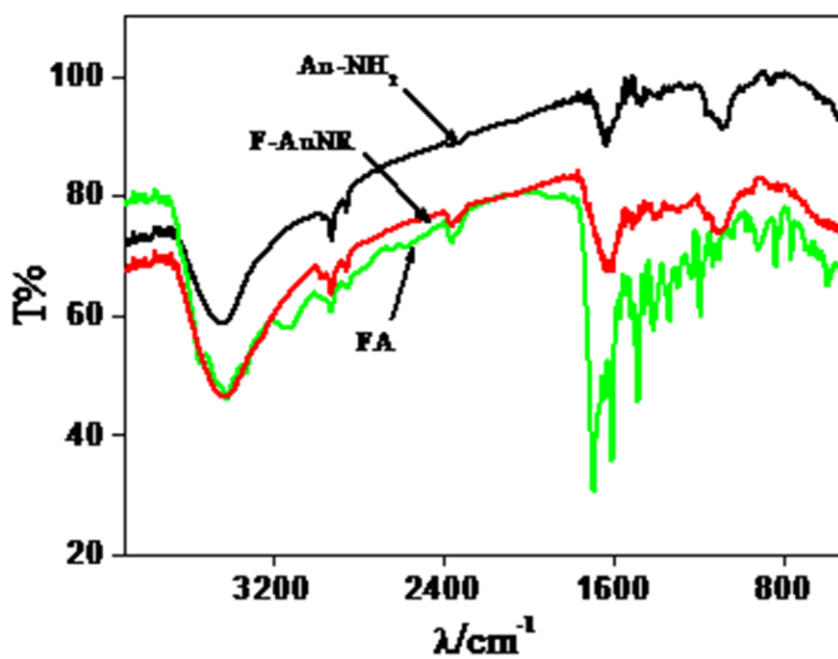

Fig. S1. Infrared spectra of AuNRs before and after folate-conjugated treatment.

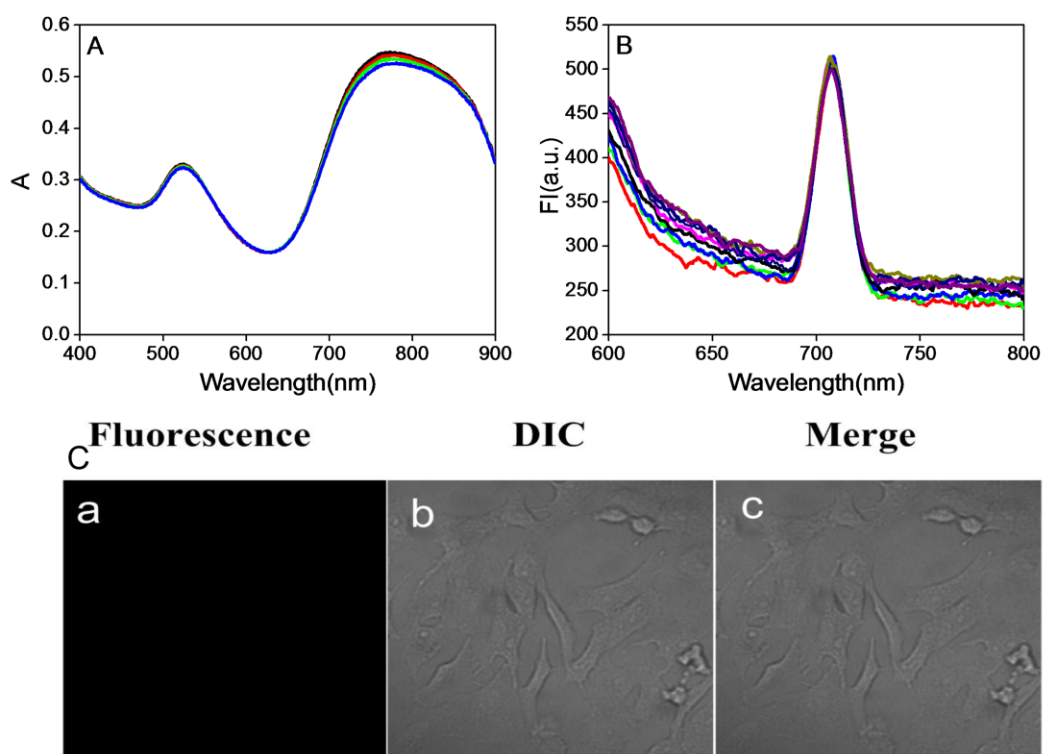

Fig. S2. UV-vis-NIR absorption spectrum(A), fluorescence spectrum(B) and fluorescence images(C) of F-AuNRs on Vero normal cells. (a)was fluorescence images; (b), was DIC images, and (c) was merge of (a) and (b).
